# Supplementary material for: Endothelial cell Pannexin1 modulates severity of ischemic stroke by regulating cerebral inflammation and myogenic tone
Source: JCI journal article supplement (doi:10.1172/jci.insight.96272), 2018-03-21
Supplement: sd1 [file 1]

**Supplemental Data for:**

Endothelial cell Pannexin1 modulates severity of ischemic stroke by regulating cerebral  
inflammation and myogenic tone

|                                        |                                |
|----------------------------------------|--------------------------------|
| Miranda E Good, PhD <sup>1</sup>       | mgood@virginia.edu             |
| Stephanie A Eucker MD/PhD <sup>2</sup> | stephanie.eucker@duke.edu      |
| Jun Li PhD <sup>3</sup>                | jl3fx@virginia.edu             |
| Hannah M Bacon BS <sup>1</sup>         | hmb4pc@virginia.edu            |
| Susan M Lang MD <sup>1</sup>           | sl4pp@virginia.edu             |
| Joshua T Butcher PhD <sup>1</sup>      | jbutcher@augusta.edu           |
| Tyler J Johnson BA <sup>1</sup>        | tjj4k@virginia.edu             |
| Ronald P Gaykema <sup>3</sup>          | rg9d@virginia.edu              |
| Manoj K Patel <sup>3</sup>             | mkp5u@hscmail.mcc.virginia.edu |
| Zhiyi Zuo MD/PhD <sup>3</sup>          | zz3c@virginia.edu              |
| Brant E Isakson PhD <sup>1,4*</sup>    | brant@virginia.edu             |

<sup>1</sup> Robert M Berne Cardiovascular Research Center, University of Virginia School of Medicine

<sup>2</sup> Division of Emergency Medicine, Department of Surgery, Duke University

<sup>3</sup> Department of Anesthesiology, University of Virginia School of Medicine

<sup>4</sup> Department of Molecular Physiology and Biophysics, University of Virginia School of Medicine

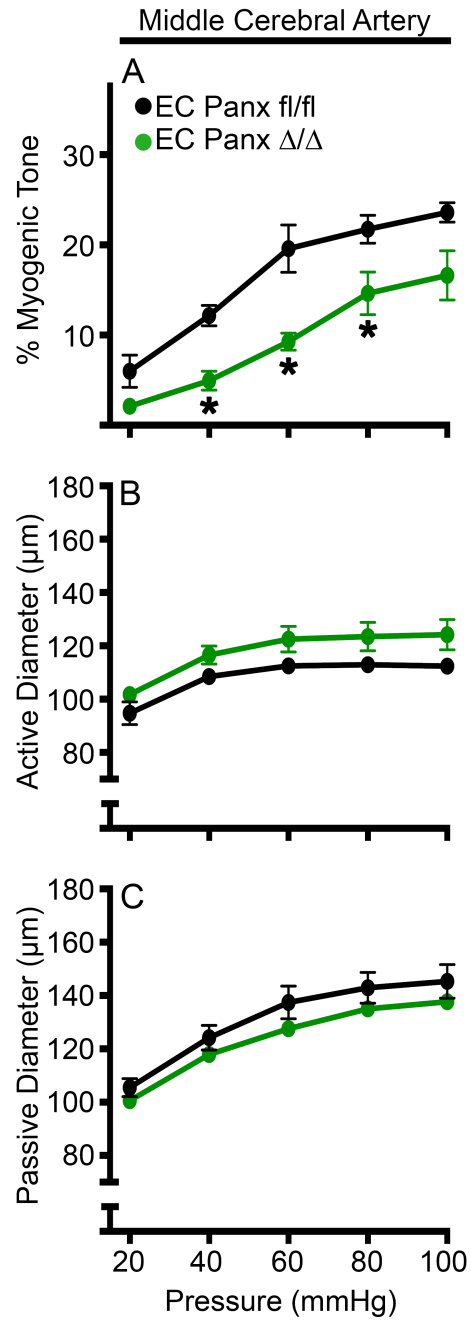

**Supplemental Figure 1:** Middle cerebral arteries from mice lacking EC Panx1 show similarly reduced myogenic tone development compared to posterior cerebral arteries. Percent myogenic tone (A), active diameter (B), and passive diameter (C) of isolated, pressurized middle cerebral arteries from EC Panx1 fl/fl and EC Panx1  $\Delta/\Delta$  mice were analyzed. EC Panx1 fl/fl N = 3, and EC Panx1  $\Delta/\Delta$  N = 3 mice. \* p < 0.05. Two-way ANOVA/Sidak's multiple comparisons post-hoc test.
